# Supplementary material for: Exploring 5-fluoronicotinic acid as a versatile building block for the generation of topologically diverse metal–organic and supramolecular Ni, Co, and Cd networks
Source: Royal Society of Chemistry journal article supplement (doi:10.1039/c4ra14534h), 2015-01-01
Supplement: c4ra14534h1.pdf [file c4ra14534h1.pdf]

## Supporting Information

### **Exploring 5-fluoronicotinic acid as a versatile building block for the generation of topologically diverse metal-organic and supramolecular Ni, Co, and Cd networks**

**Yan-Hui Cui,<sup>a</sup> Jiang Wu,<sup>a</sup> Alexander M. Kirillov,<sup>b</sup> Jin-Zhong Gu<sup>\*a</sup> and Wei Dou<sup>a</sup>**

Corresponding author. Fax: +86 931 8915196. *E-mail address*: gujzh@lzu.edu.cn (J.-Z. Gu)

<sup>a</sup> *Key Laboratory of Nonferrous Metal Chemistry and Resources Utilization of Gansu Province, College of Chemistry and Chemical Engineering, Lanzhou University, Lanzhou 730000, P. R. China*

<sup>b</sup> *Centro de Química Estrutural, Complexo I, Instituto Superior Técnico, Universidade de Lisboa, Av. Rovisco Pais, 1049-001, Lisbon, Portugal*

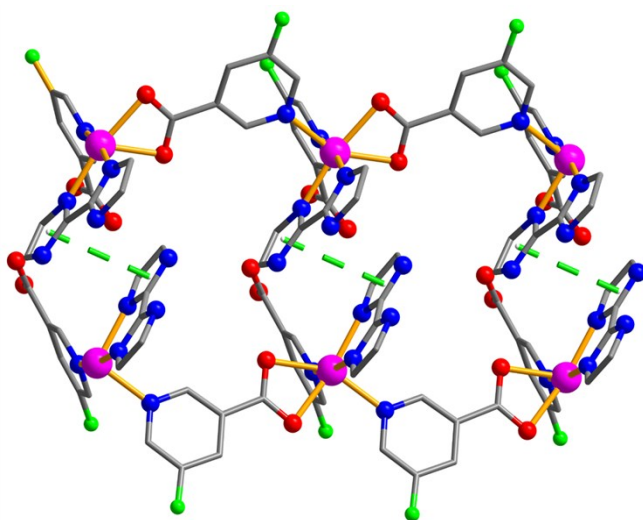

**Fig. S1**  $\pi$ - $\pi$  Packing interaction between the adjacent layers in **2**.

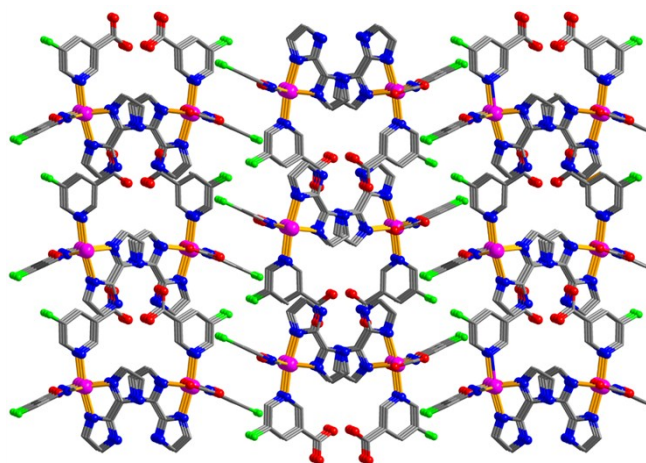

**Fig. S2** Perspective of the 3D supramolecular framework along the *bc* plane in **2**.

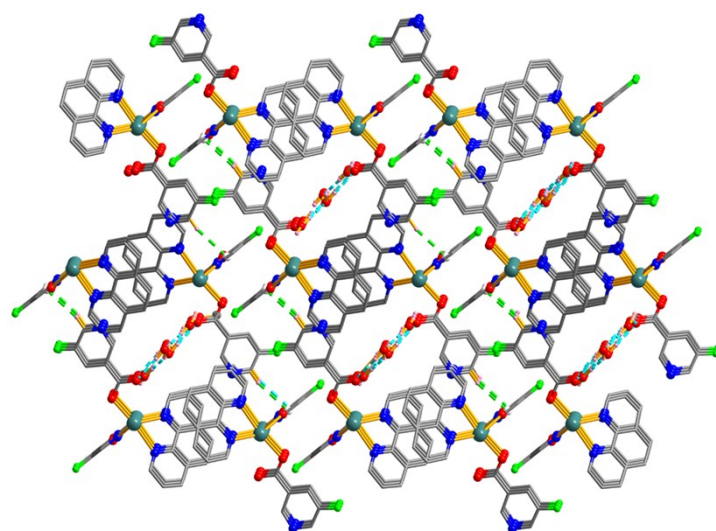

**Fig. S3** Perspective of a 3D supramolecular framework in **3** along the *ac* plane (blue and green dashed lines present the H-bonding and C–H $\cdots$  $\pi$  interactions, respectively).
